# Supplementary material
Source: MDPI journal article supplement (https://www.mdpi.com/2073-4344/12/10/1136)
Supplement: s1 [file s1]

# Supplementary Information

**Table S1.** FAOR Activity comparisons of RuPd<sub>3</sub> ANs with the previously reported catalysts.

| Catalysts                                             | Electrolyte                                        | Mass Activity<br>(mA/mg <sub>noble metal</sub> ) | Oxidation potential (V<br>vs RHE) | Ref       |
|-------------------------------------------------------|----------------------------------------------------|--------------------------------------------------|-----------------------------------|-----------|
| RuPd <sub>3</sub> ANs                                 | 0.5 M HCCOH + 0.5 M H <sub>2</sub> SO <sub>4</sub> | 2068.4                                           | 0.440                             | This work |
| PdCu ANCs                                             | 0.5 M HCCOH + 0.5 M H <sub>2</sub> SO <sub>4</sub> | 554.53                                           | 0.442                             | [44]      |
| Pd NBs                                                | 0.5 M HCCOH + 0.5 M H <sub>2</sub> SO <sub>4</sub> | 464                                              | 0.5                               | [11]      |
| Pd <sub>3</sub> Pt                                    | 0.5 M HCCOH + 0.5 M H <sub>2</sub> SO <sub>4</sub> | 318                                              | 0.34                              | [29]      |
| Pd-PNRs                                               | 0.5 M HCCOH + 0.5 M H <sub>2</sub> SO <sub>4</sub> | 295.69                                           | 0.432                             | [49]      |
| Pd-NDAs                                               | 0.5 M HCCOH + 0.5 M H <sub>2</sub> SO <sub>4</sub> | 451.6                                            | 0.262                             | [50]      |
| Pd HPNSs                                              | 0.5 M HCCOH + 0.5 M H <sub>2</sub> SO <sub>4</sub> | 203.2                                            | 0.392                             | [51]      |
| PdRu NPAs                                             | 0.5 M HCCOH + 0.5 M H <sub>2</sub> SO <sub>4</sub> | 1950                                             | > 0.6                             | [30]      |
| Pd nanosheets                                         | 0.5 M HCCOH + 0.5 M H <sub>2</sub> SO <sub>4</sub> | 409.3                                            | 0.398                             | [52]      |
| Pd <sub>53</sub> Cu <sub>47</sub>                     | 0.5 M HCCOH + 0.5 M H <sub>2</sub> SO <sub>4</sub> | 430                                              | 0.522                             | [53]      |
| Pd <sub>36</sub> P <sub>25</sub> @Pt <sub>39</sub> /C | 0.5 M HCCOH + 0.5 M H <sub>2</sub> SO <sub>4</sub> | 502                                              | 0.6                               | [54]      |
| PdRu                                                  | 0.5 M HCCOH + 0.5 M H <sub>2</sub> SO <sub>4</sub> | 190                                              | 0.522                             | [55]      |
| Pd <sub>51</sub> Cu <sub>49</sub>                     | 0.5 M HCCOH + 0.5 M H <sub>2</sub> SO <sub>4</sub> | 517                                              | 0.422                             | [56]      |
| D-PdBi/C                                              | 0.5 M HCCOH + 0.5 M H <sub>2</sub> SO <sub>4</sub> | ≈ 1035                                           | > 0.5                             | [57]      |
| Pd-P/C                                                | 0.5 M HCCOH + 0.5 M H <sub>2</sub> SO <sub>4</sub> | 57.06                                            | 0.392                             | [58]      |
| Pd <sub>3</sub> Sn/C-500.                             | 0.5 M HCCOH + 0.5 M H <sub>2</sub> SO <sub>4</sub> | ≈ 600                                            | 0.5                               | [59]      |
| Au <sub>71</sub> @Pd <sub>29</sub> DCS                | 0.5 M HCCOH + 0.5 M H <sub>2</sub> SO <sub>4</sub> | 642                                              | 0.452                             | [2]       |
| Pd <sub>3</sub> Co/CNT                                | 0.5 M HCCOH + 0.5 M H <sub>2</sub> SO <sub>4</sub> | 1964                                             | 0.482                             | [10]      |
| PdRuBP                                                | 0.5 M HCCOH + 0.5 M H <sub>2</sub> SO <sub>4</sub> | 1710                                             | ≈ 0.45                            | [60]      |
| PdNi/C                                                | 0.5 M HCCOH + 0.5 M H <sub>2</sub> SO <sub>4</sub> | ≈ 450                                            | > 0.4                             | [61]      |

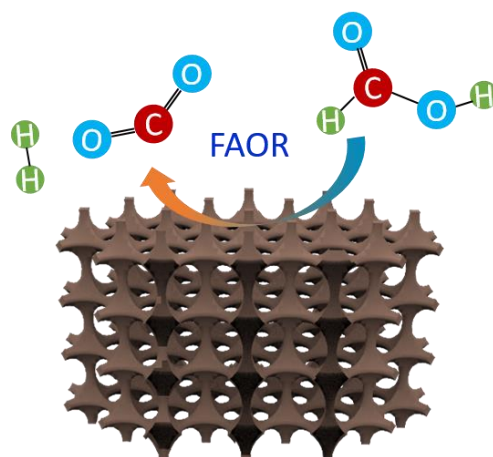

**Scheme S1.** Schematic diagram of the electrocatalytic FAOR of RuPd<sub>3</sub> ANs.

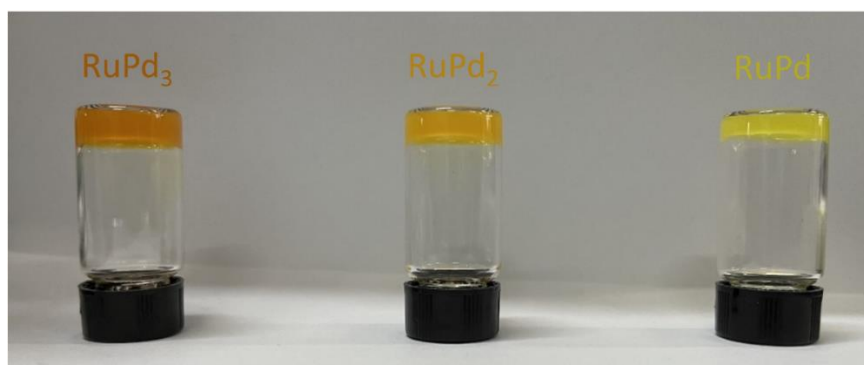

**Figure S1.** Photographs of Pd<sub>x</sub>[Ru(CN)<sub>6</sub>]<sub>y</sub>·aH<sub>2</sub>O cyanogels with different Pd/Ru ratio.

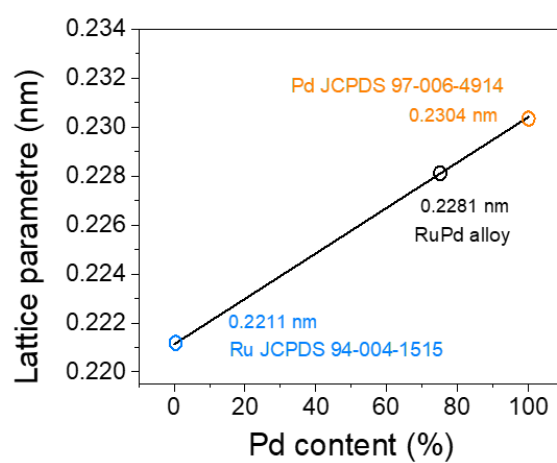

**Figure S2.** The plot of lattice parameter versus Pd atomic percentage of RuPd<sub>3</sub> ANs.

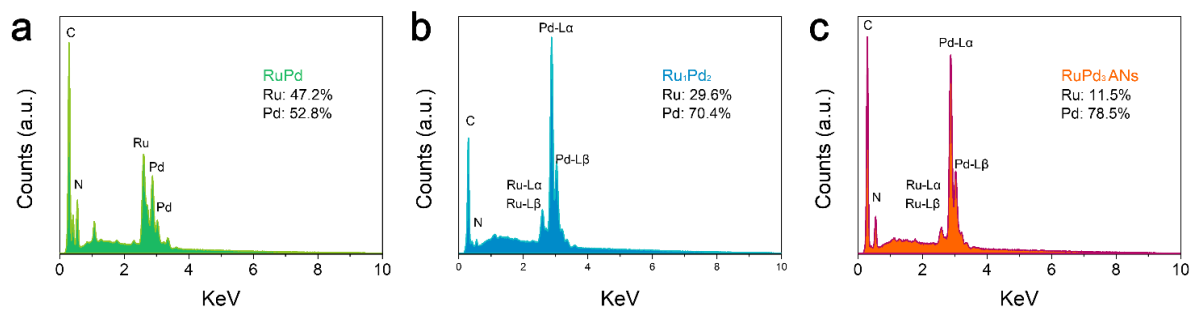

**Figure S3.** EDS spectrum of (a) RuPd; (b) RuPd<sub>2</sub> and; (c) RuPd<sub>3</sub> ANs, respectively.

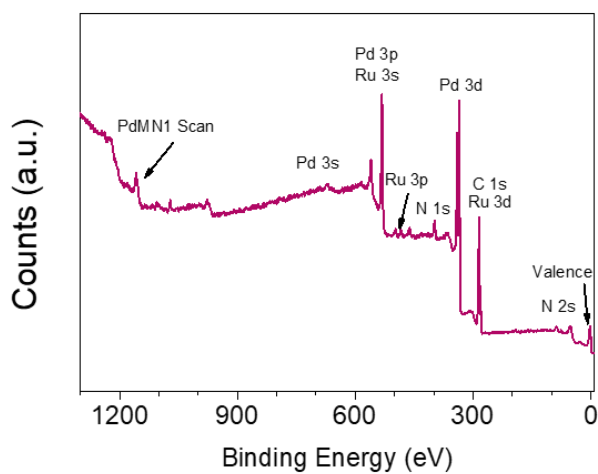

**Figure S4.** XPS survey spectrum of RuPd<sub>3</sub> ANs.

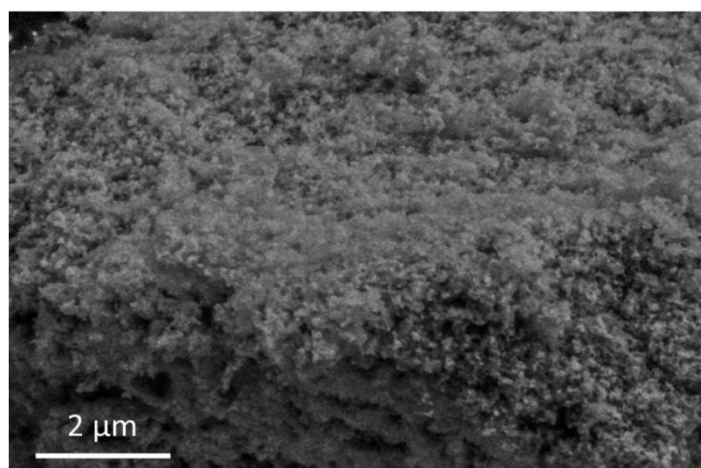

**Figure S5.** Large-scale SEM image of RuPd<sub>3</sub> ANs.

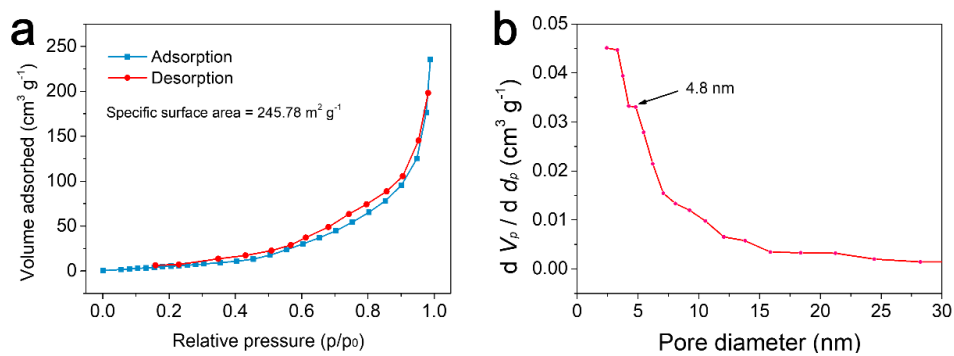

**Figure S6.** (a) N<sub>2</sub> adsorption-desorption isotherms and; (b) Brunauer-Emmett-Teller (BET) pore size distribution calculated of RuPd<sub>3</sub> ANs.

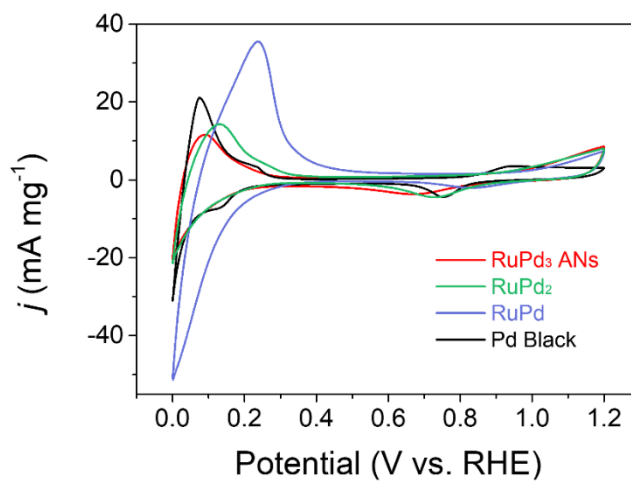

**Figure S7.** Cyclic voltammetry curves of RuPd<sub>3</sub> ANs, RuPd<sub>2</sub>, RuPd and Pd black in 0.5 M H<sub>2</sub>SO<sub>4</sub> solution.

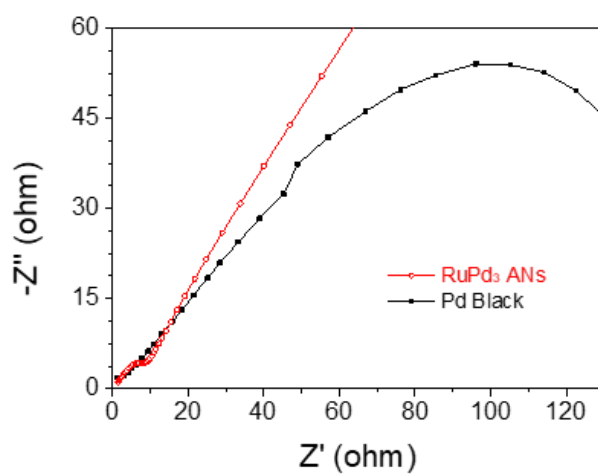

**Figure S8.** Nyquist curves of RuPd<sub>3</sub> ANs and Pd Black in 0.5 M H<sub>2</sub>SO<sub>4</sub> + 0.5 M HCOOH electrolyte.

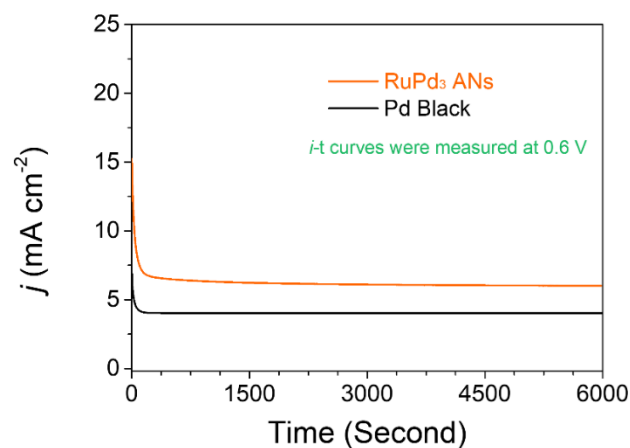

**Figure S9.** Chronoamperometric curves obtained at 0.6 V (vs RHE) in N<sub>2</sub>-saturated 0.5 M H<sub>2</sub>SO<sub>4</sub> + 0.5 M HCOOH solution.

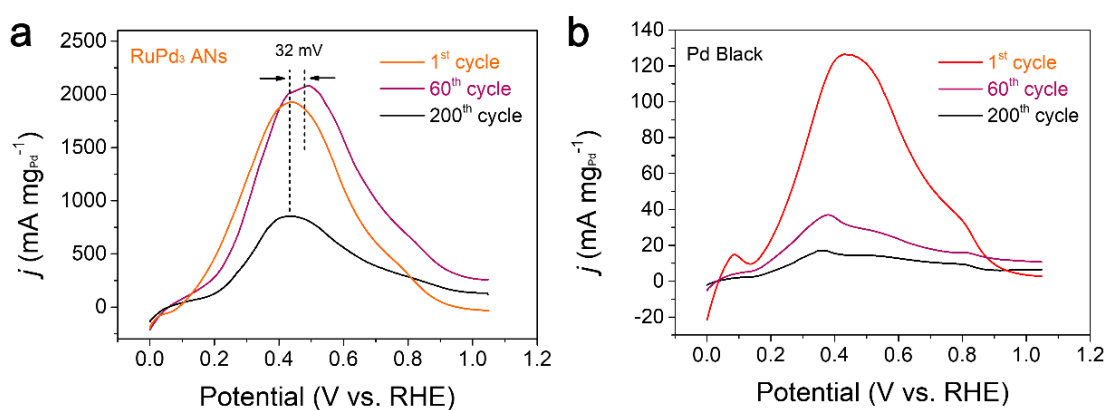

**Figure S10.** The 1<sup>st</sup>, 60<sup>th</sup> and 200<sup>th</sup> FAOR curves for accelerated durability tests (ADTs) tests in N<sub>2</sub>-saturated 0.5 M H<sub>2</sub>SO<sub>4</sub> + 0.5 M HCOOH solution, compared (a) RuPd<sub>3</sub> ANs and (b) Pd black.

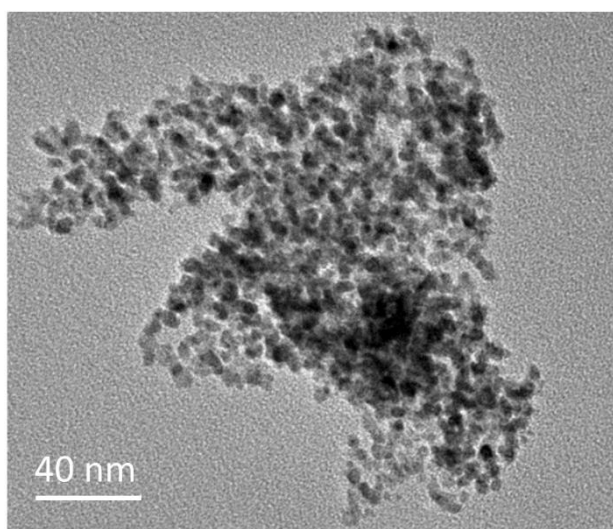

**Figure S11.** TEM image of RuPd<sub>3</sub> ANs after 200 cycles ADTs test.
